# Supplementary material for: Preparation of high-performance quasi-two-dimensional (Q-2D) perovskite solar cells by fluorinated benzylamine groups at different substitution positions
Source: Royal Society of Chemistry journal article supplement (doi:10.1039/d4cp04357j), 2025-01-01
Supplement: d4cp04357j1.pdf [file d4cp04357j1.pdf]

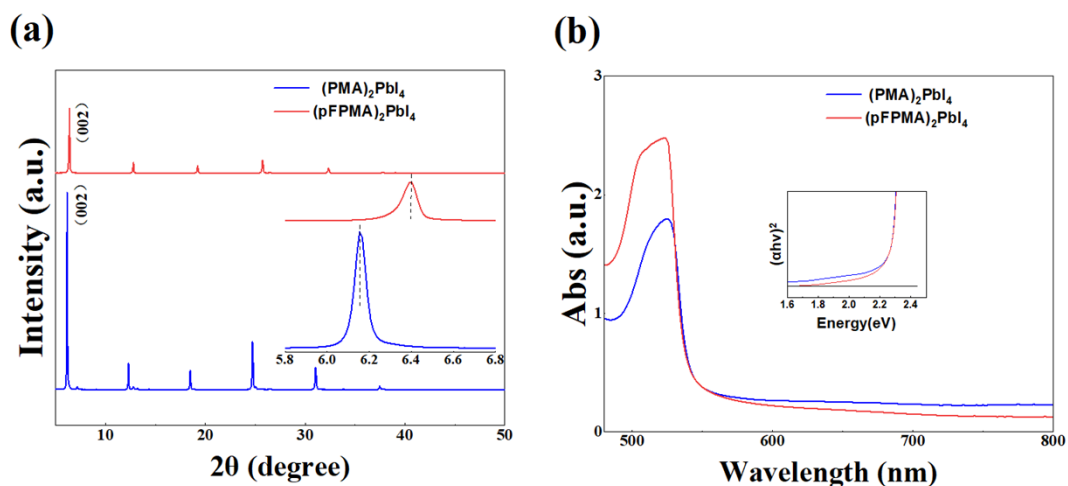

**Figure S1.** (a) XRD patterns of  $(\text{PMA})_2\text{PbI}_4$  and  $(\text{pFPMA})_2\text{PbI}_4$  films. The inset is the enlarged XRD patterns with  $2\theta$  between  $5.8^\circ$  and  $6.8^\circ$ . (b) UV-vis absorption spectra of the  $(\text{PMA})_2\text{PbI}_4$  and  $(\text{pFPMA})_2\text{PbI}_4$  films. The inset is the band gap of films.

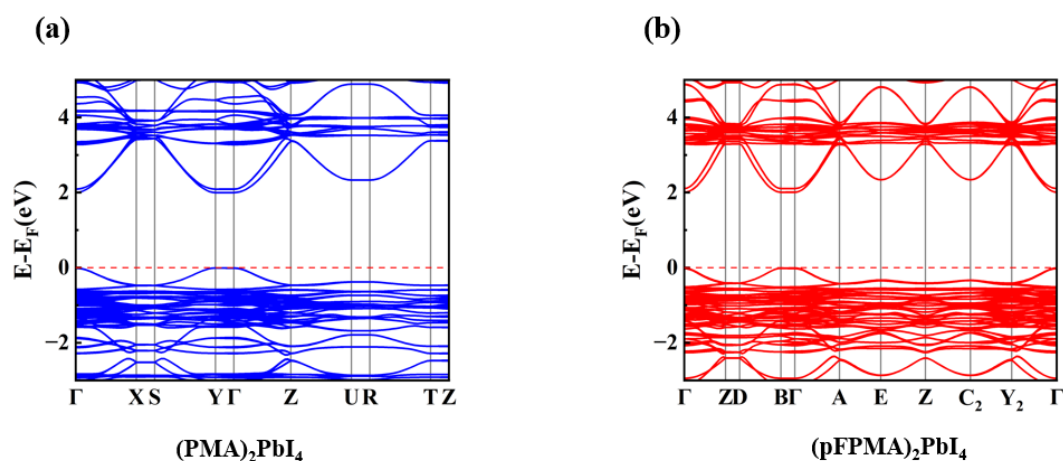

**Figure S2.** Calculated electronic band structure for  $(\text{PMA})_2\text{PbI}_4$ . (b) Calculated electronic band structure for  $(\text{pFPMA})_2\text{PbI}_4$ .

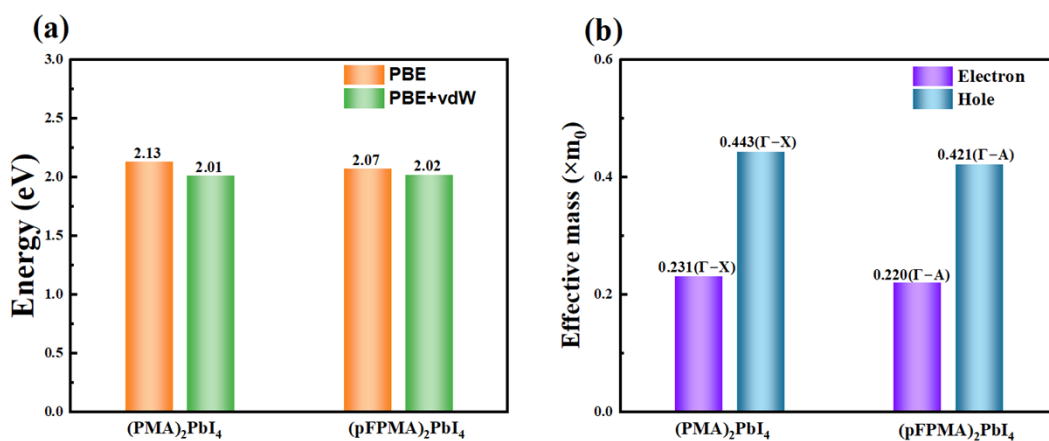

**Figure S3.** (a) Band gaps of  $(\text{PMA})_2\text{PbI}_4$  and  $(\text{pFPMA})_2\text{PbI}_4$  calculated using PBE and PBE + vdW. (b) Effective masses of electrons and holes in  $(\text{PMA})_2\text{PbI}_4$  and  $(\text{pFPMA})_2\text{PbI}_4$ .
